# Supplementary material for: Effects of Arbovirus Multi-Host Life Cycles on Dinucleotide and Codon Usage Patterns
Source: PubMed Central journal article supplement (PMC6669465; doi:10.3390/v11070643), 2019-07-12
Supplement: viruses-11-00643-s001.pdf [file viruses-11-00643-s001.pdf]

|                     |   | Second Base of Codon |                   |            |               |            |                   |                     |              |                |
|---------------------|---|----------------------|-------------------|------------|---------------|------------|-------------------|---------------------|--------------|----------------|
|                     |   | U                    |                   | C          |               | A          |                   | G                   |              |                |
| First Base of Codon | U | UUU                  | Phenylalanine (F) | UCU        | Serine (S)    | <i>UAU</i> | Tyrosine (Y)      | <i>UGU</i>          | Cysteine (C) | U              |
|                     |   | UUC                  |                   | UCC        |               | <i>UAC</i> |                   | <i>UGC</i>          |              | C              |
|                     |   | <i>UUA</i>           | Leucine (L)       | <i>UCA</i> |               | <i>UAA</i> | STOP              | <i>UGA</i>          | STOP         | A              |
|                     |   | <i>UUG</i>           |                   | <i>UCG</i> |               | <i>UAG</i> |                   | <i>UGG</i>          |              | Tryptophan (W) |
|                     | C | CUU                  | Leucine (L)       | CCU        | Proline (P)   | CAU        | Histidine (H)     | CGU                 | Arginine (R) | U              |
|                     |   | CUC                  |                   | CCC        |               | CAC        |                   | CGC                 |              | C              |
|                     |   | CUA                  |                   | CCA        |               | <i>CAA</i> | Glutamine (Q)     | <i>CGA</i>          |              | A              |
|                     |   | CUG                  |                   | CCG        |               | <i>CAG</i> |                   | CGG                 |              | G              |
|                     | A | AUU                  | Isoleucine (I)    | ACU        | Threonine (T) | AAU        | Asparagine (N)    | AGU                 | Serine (S)   | U              |
|                     |   | AUC                  |                   | ACC        |               | AAC        |                   | AGC                 |              | C              |
|                     |   | AUA                  |                   | ACA        |               | <i>AAA</i> | Lysine (K)        | <i>AGA</i>          | Arginine (R) | A              |
|                     |   | AUG                  | Methionine (M)    | ACG        |               | <i>AAG</i> |                   | AGG                 |              | G              |
|                     | G | GUU                  | Valine (V)        | GCU        | Alanine (A)   | GAU        | Aspartic Acid (D) | GGU                 | Glycine (G)  | U              |
|                     |   | GUC                  |                   | GCC        |               | GAC        |                   | GGC                 |              | C              |
|                     |   | GUA                  |                   | GCA        |               | <i>GAA</i> | Glutamic Acid (E) | <i>GGA</i>          |              | A              |
|                     |   | GUG                  |                   | GCG        |               | <i>GAG</i> |                   | GGG                 |              | G              |
|                     |   |                      |                   |            |               |            |                   | Third Base of Codon |              |                |

**Supplementary Figure 1.** Codon usage table with one-to-stop (OTS) codons. Stop codons are highlighted in red and OTS codons are indicated with bold italicized letters.
